# Supplementary material for: Lanthanide selective sorbents: self-assembled monolayers on mesoporous supports (SAMMS)
Source: Royal Society of Chemistry journal article supplement (doi:10.1039/b408181a), 2004-01-01
Supplement: b408181a.pdf [file b408181a.pdf]

## Supplementary Information

X-ray absorption fine structure (XAFS) spectroscopy measurements at the Eu L-III absorption edge were made on the SAMMs material and a  $\text{Eu}_2\text{O}_3$  standard at the Materials Research Collaborative Research Team (MRCAT) beamline at the Advanced Photon Source.[1] Measurements of SAMMs material were made in the fluorescence mode and measurements of the  $\text{Eu}_2\text{O}_3$  standard were made in the transmission mode. For these experiments, the undulator gap was tapered ( $\Delta E \sim 1$  keV) and scanned while a double crystal silicon [111] monochromator was used to select the x-ray energy. Higher order harmonics were removed with a harmonic rejection mirror. The  $\text{I}_0$  ion chamber was filled with a nitrogen/helium (10/90) gas mixture. The transmission and fluorescence ion chambers were filled with free flowing Ar at atmospheric pressure. Linearity test [2] were performed on both samples and indicated less than 0.3% nonlinearity in the experimental setup for a 50% attenuation of the incident x-ray beam intensity. All measurements were repeated three times and the resulting  $\chi(k)$  data were averaged. The MacXAFS analysis software (*version 4.0*) [3] was used in this study.

The top data plot of figure (X) illustrates the quality of the averaged  $k^3$  – weighted data for the SAMMs material. The middle plot of figure (X) illustrates the results of the Fourier transform ( $\Delta K=1.6\text{--}10.6 \text{ \AA}^{-1}$ ,  $dk=1.25 \text{ \AA}^{-1}$ ) of the  $k^3$  – weighted data. A single shell, single scattering model was used to fit the Fourier filtered first shell data ( $\Delta R=1.12\text{--}2.65 \text{ \AA}$ ) of the  $\text{Eu}_2\text{O}_3$  standard with the theoretical *FEFF7* code [4]. The input parameters required to reproduce the Fourier filtered  $\text{Eu}_2\text{O}_3$  standard data ( $E_0=-2$  eV,  $S_0^2=0.9$ ) were used to fit similarly Fourier filtered ( $\Delta R=1.02\text{--}2.55 \text{ \AA}$ ) SAMMs data. Results of the fit of the  $\text{Eu}_2\text{O}_3$  standard data indicated a Eu-O coordination number of  $6 \pm 1$ , a radial distance

of  $2.33 \pm 0.015 \text{ \AA}$ , and an XAFS Debye-Waller term of  $0.0124 \pm 0.0025 \text{ \AA}^{-2}$ . These results are in agreement with a previous study [5]. The bottom plot of Figure A illustrates the quality of fit of the Fourier filtered Eu L-III XAFS data from the SAMMs material. Results of the fitting analysis indicate an average Eu-O coordination number of  $8 \pm 1.2$ , a Eu-O radial distance of  $2.40 \pm 0.015 \text{ \AA}$ , and an XAFS Debye-Waller term of  $0.0145 \pm 0.0025 \text{ \AA}^{-2}$ . These results are consistent with the Eu ion being octacoordinate, in either a square prism or square antiprism coordination environment.

### **Cited Literature**

1. C. U. Segre, N. E. Leyarowska, L. D. Chapman, W. M. Lavender, P. W. Plag, A. S. King, A. J. Kropf, B. A. Bunker, K. M. Kemner, P. Dutta, R. S. Duran, and J. Kaduk, *Synchrotron Radiation Instrumentation: Eleventh U.S. National Conference*, edited by P. Pianetta, et al., pg. 419-422, American Institute of Physics, New York, 2000.
2. K. M. Kemner, J. Kropf, and B. A. Bunker, *Rev. Sci. Instrum* **65**, 3667-3669 (1994).
3. C. E. Bouldin, W. T. Elam and L. Furenlid, *Physica B*, **208&209**, 190-192 (1995).
4. S. I. Zabinski, J. J. Rehr, A. Ankudinov, R. C. Albers, and M. J. Eller, *Phys. Rev. B* **52**, 2995-3009 (1995).
5. U. Shimizugawa, N. Umesaki, J. Qiu, and K. Hirao, *J. Synchrotron Rad.* **6**, 624-626 (1999).

Sup  
Thi

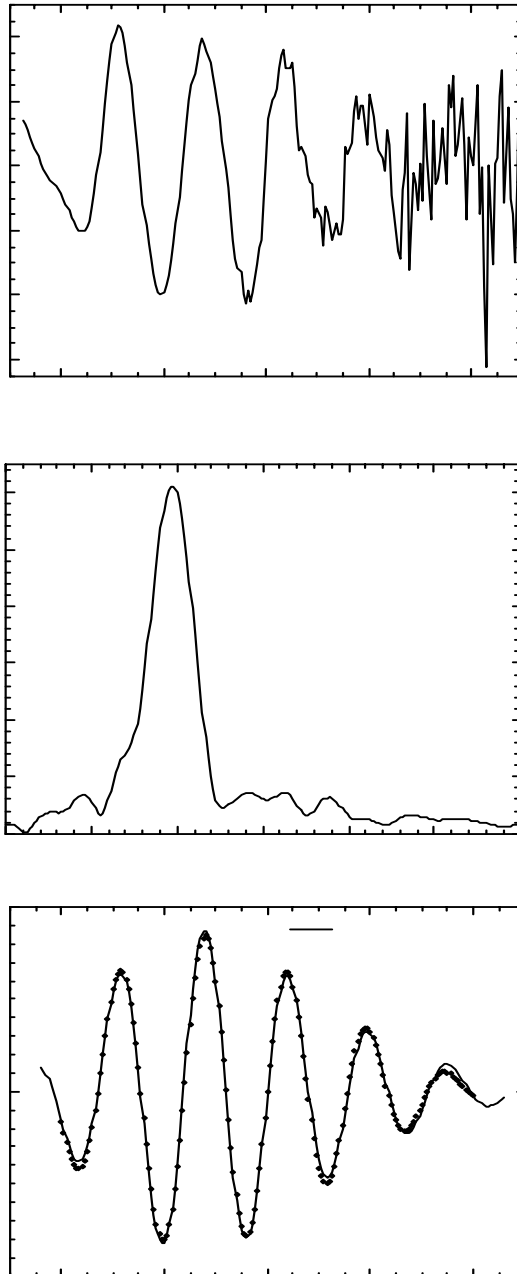

**Figure A.** Eu L-III XAFS results indicating the quality of the  $k^3$ -weighted  $\chi(k)$  data (top), the Fourier transform of the  $k^3$ -weighted  $\chi(k)$  data (middle), and the quality of the theoretical fit to the Fourier filtered first shell data (bottom).
